# Supplementary material for: An RNA Switch of a Large Exon of Ninein Is Regulated by the Neural Stem Cell Specific-RNA Binding Protein, Qki5
Source: MDPI journal article supplement (doi:10.3390/ijms20051010), 2019-02-26
Supplement: s1 [file s1]

Table S1. Transcript level changes in *Qk* cKO

| gene.ids  | gene.names    | logFC | logCPM | PValue      | p.adj       |
|-----------|---------------|-------|--------|-------------|-------------|
| 16669     | Krt19         | -7.81 | -1.33  | 8.01E-10    | 3.69E-06    |
| 20296     | Ccl2          | -6.31 | -2.55  | 8.45E-05    | 0.055630428 |
| 435766    | Tnni3k        | -6.23 | -2.60  | 0.000108017 | 0.063807378 |
| 75388     | Boll          | -6.07 | -2.71  | 0.000146101 | 0.079330345 |
| 20388     | Sftpb         | -4.30 | -2.23  | 0.000204561 | 0.085685053 |
| 69189     | 1810033817Rik | -4.14 | -2.36  | 0.000137195 | 0.077090197 |
| 23925     | Kel           | -2.37 | -0.93  | 9.61E-05    | 0.059839741 |
| 21819     | Tg            | -2.30 | -0.98  | 2.11E-05    | 0.016722719 |
| 12821     | Col17a1       | -2.10 | -0.74  | 5.37E-05    | 0.038632205 |
| 67425     | Eps8l1        | -1.79 | 2.18   | 6.68E-07    | 0.001256106 |
| 20518     | Slc22a2       | -1.71 | -0.30  | 0.000200396 | 0.085647291 |
| 19317     | Qk            | -0.64 | 8.08   | 9.42E-12    | 2.17E-07    |
| 15452     | Hprt          | -0.63 | 5.49   | 3.81E-07    | 0.000797325 |
| 228482    | Arhgap11a     | -0.58 | 6.79   | 3.74E-08    | 0.000107813 |
| 12444     | Ccnd2         | -0.36 | 9.35   | 0.000192326 | 0.085647291 |
| 21923     | Tnc           | 0.38  | 6.80   | 0.000193303 | 0.085647291 |
| 14199     | Fhl1          | 0.40  | 6.10   | 2.28E-05    | 0.017473508 |
| 57776     | Ttyh1         | 0.44  | 7.33   | 2.97E-06    | 0.004269489 |
| 69219     | Ddah1         | 0.44  | 6.73   | 5.46E-06    | 0.006372177 |
| 26451     | Rpl27a        | 0.45  | 5.41   | 7.24E-05    | 0.050552239 |
| 18797     | Plcb3         | 0.45  | 5.25   | 0.0001635   | 0.083704564 |
| 12140     | Fabp7         | 0.46  | 9.28   | 2.35E-06    | 0.003611677 |
| 68977     | Haghl         | 0.47  | 5.03   | 0.000181166 | 0.085647291 |
| 105501    | Abhd4         | 0.47  | 4.93   | 0.000148069 | 0.079330345 |
| 20090     | Rps29         | 0.47  | 5.13   | 0.000197392 | 0.085647291 |
| 14109     | Fau           | 0.48  | 4.71   | 0.000237212 | 0.095447392 |
| 320165    | Tacc1         | 0.49  | 5.49   | 8.24E-06    | 0.00862461  |
| 18611     | Pea15a        | 0.51  | 8.53   | 8.10E-08    | 0.000186623 |
| 320910    | Itgb8         | 0.52  | 4.37   | 0.000240296 | 0.095447392 |
| 19943     | Rpl28         | 0.53  | 5.02   | 1.37E-05    | 0.012110225 |
| 17751     | Mit3          | 0.55  | 4.93   | 1.04E-05    | 0.009986615 |
| 225743    | Rnf165        | 0.55  | 6.62   | 1.91E-08    | 6.27E-05    |
| 68836     | Mrpl52        | 0.55  | 5.58   | 5.81E-06    | 0.006372177 |
| 319555    | Nwd1          | 0.63  | 3.55   | 0.000216601 | 0.089108037 |
| 107747    | Aldh1l1       | 0.63  | 4.92   | 7.09E-07    | 0.001256106 |
| 12824     | Col2a1        | 0.63  | 6.92   | 2.55E-10    | 1.47E-06    |
| 22329     | Vcam1         | 0.64  | 5.14   | 1.18E-06    | 0.001938561 |
| 13040     | Ctss          | 0.64  | 3.24   | 0.00010738  | 0.063807378 |
| 71584     | Gdpd2         | 0.70  | 3.81   | 9.38E-06    | 0.009391855 |
| 170790    | Mlc1          | 0.70  | 4.73   | 7.65E-08    | 0.000186623 |
| 20319     | Sfrp2         | 0.70  | 3.82   | 4.60E-06    | 0.005887622 |
| 13618     | Ednrb         | 0.77  | 5.30   | 1.36E-10    | 1.05E-06    |
| 30052     | Pcsk1n        | 0.78  | 3.08   | 3.68E-05    | 0.027322341 |
| 208501    | 1810043H04Rik | 0.85  | 1.92   | 0.00019779  | 0.085647291 |
| 16869     | Lhx1          | 0.96  | 2.49   | 0.000133226 | 0.076731512 |
| 320452    | P4ha3         | 0.98  | 2.46   | 1.55E-05    | 0.012720707 |
| 214106    | 4933430117Rik | 1.11  | 1.31   | 9.48E-05    | 0.059839741 |
| 100503019 | Gm16551       | 1.35  | 0.84   | 1.29E-05    | 0.011842205 |
| 16373     | Irx3          | 1.47  | -0.17  | 0.000192469 | 0.085647291 |
| 18976     | Pomc          | 2.36  | 0.46   | 5.71E-06    | 0.006372177 |
| 18088     | Nkx2-2        | 2.83  | -0.40  | 1.45E-05    | 0.012409002 |
| 73720     | Cst6          | 2.99  | -1.89  | 0.000197556 | 0.085647291 |
| 22412     | Wnt9b         | 3.36  | -1.96  | 0.000200753 | 0.085647291 |
| 20669     | Sox14         | 4.05  | -0.82  | 0.000160651 | 0.083704564 |
| 20476     | Six6          | 4.51  | 0.22   | 7.70E-09    | 2.96E-05    |
| 26423     | Nr5a1         | 5.08  | -0.16  | 2.97E-11    | 3.42E-07    |
| 268958    | Capn11        | 6.03  | 1.69   | 3.32E-06    | 0.004503776 |
| 14347     | Fut7          | 6.24  | -2.65  | 8.27E-05    | 0.055630428 |

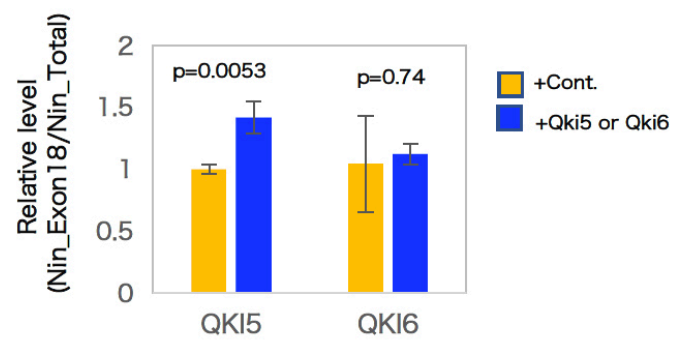

Figure S1
